# Supplementary material for: IL-12 and IL-27 regulate the phagolysosomal pathway in mycobacteria-infected human macrophages
Source: PubMed Central journal article supplement (PMC4007735; doi:10.1186/1478-811x-12-16), 2014-03-11

Additional file 2: Figure S2.

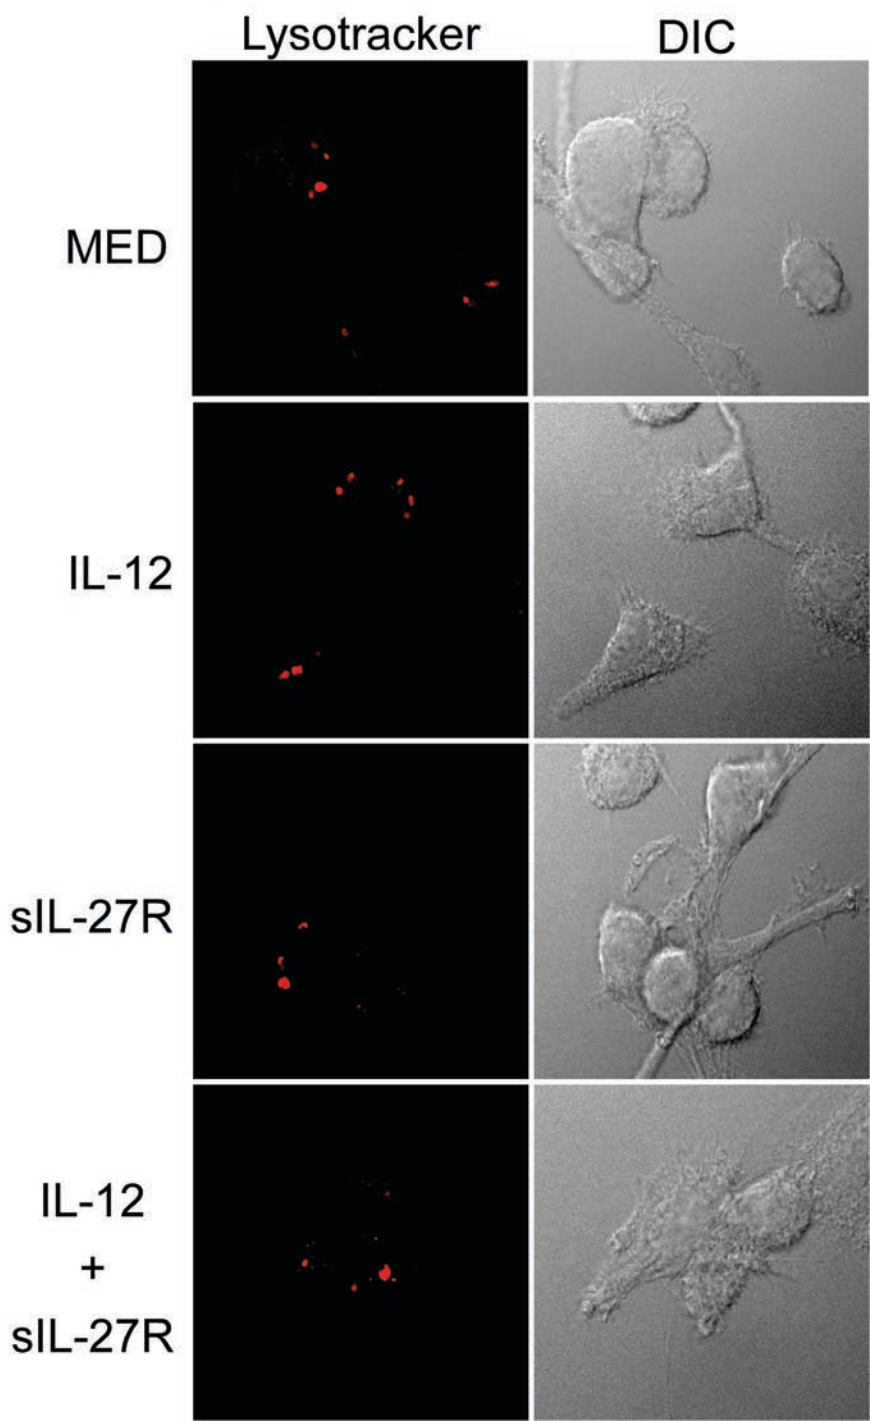

Supplement: 1478-811X-12-16-S2.pdf [file 1478-811X-12-16-S2.pdf]
